# Supplementary material
Source: PubMed Central journal article supplement (PMC3386640)
Supplement: NIHMS180293-supplement-Supplement.pdf [file NIHMS180293-supplement-Supplement.pdf]

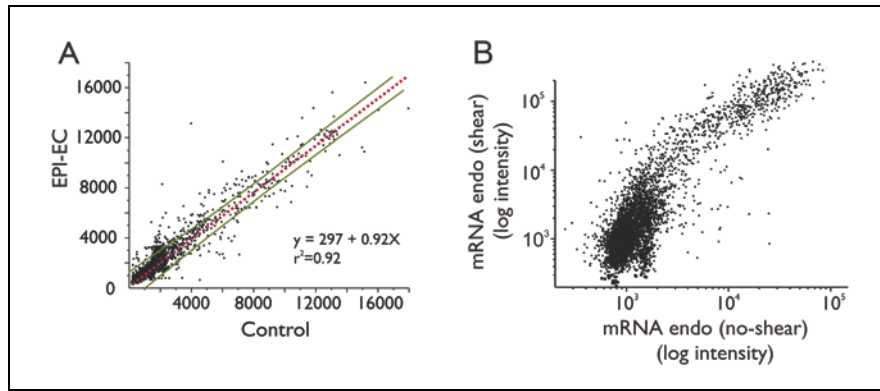

**Figure S1.** Distribution of genes within the cell types used and overall effect of shear stress. (A) Note that when comparing primary epileptic endothelial cells and control, several genes were outside of the confidence interval (green lines, 95%). Among these were CYP enzymes, but several other gene families were also regulated differently in epileptic endothelial cells. (B) Gene expression in cells grown under static (no-shear) or dynamic (DIV, 1 week, 3 dynes/cm<sup>2</sup>) conditions are compared by plotting the log of intensity values for each individual cDNA present in the filter.

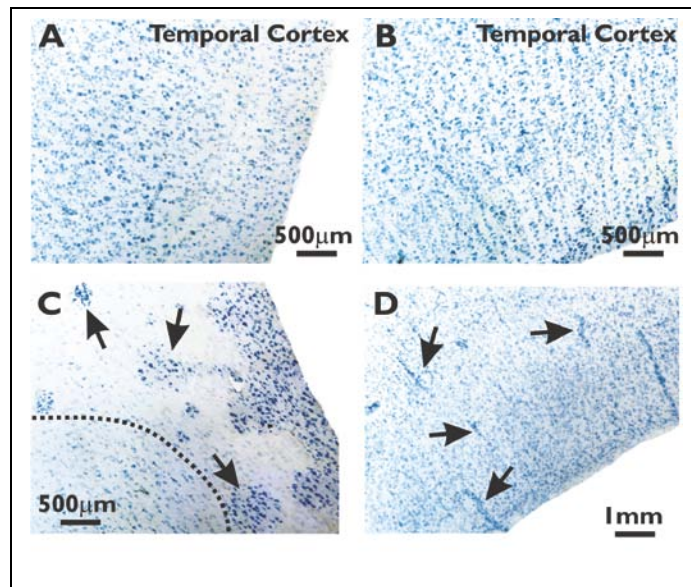

**Figure S2.** CYP3A4 brain expression is associated with vascular abnormalities and neuronal heterotopias. (C–D) Cresyl violet staining revealed the presence of ectopic neurons and dysplastic vessels in drug-resistant epileptic tissue. (A–B) Note also the presence of relatively normal cortex within the samples analyzed.

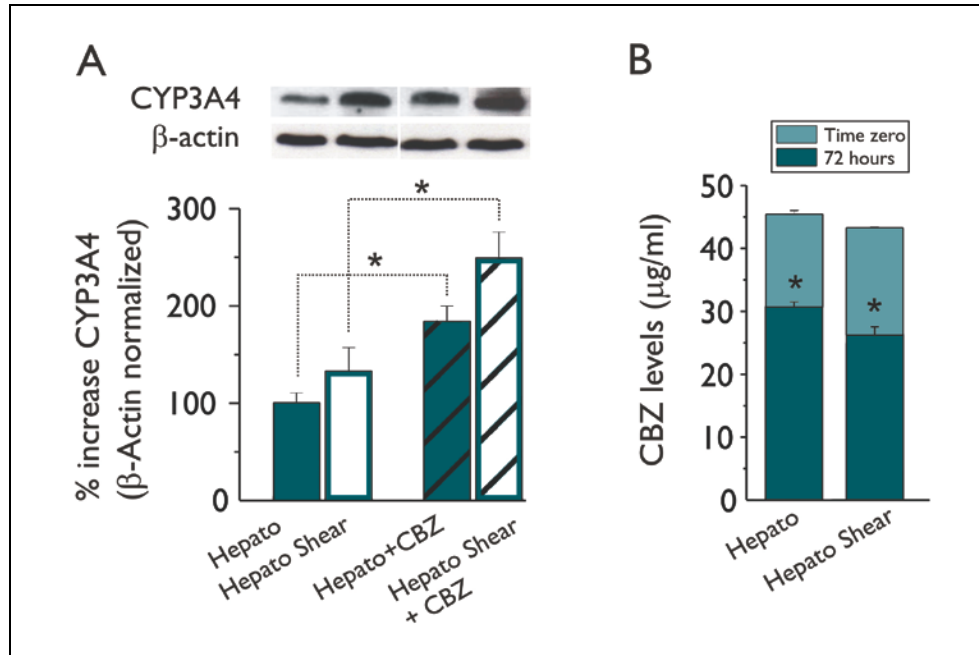

**Figure S3.** Exposure to CBZ but not to shear stress significantly induced CYP3A4 protein in human hepatocytes. **(A)** Although shear stress positively regulated the levels of CYP transcripts and proteins in endothelial cells (Figs. 2 and 3), the effects on hepatocyte was modest and not significant. However, CBZ induced CYP3A4 expression (one-way ANOVA, \* $p < 0.05$  hepato vs. hepato + CBZ and hepato-shear vs. hepato-shear + CBZ). **(B)** Exposure to shear stress led to a modest change in the amount of CBZ metabolized by hepatocytes after 72 h (one-way ANOVA, \* $p < 0.05$  time zero vs. 72 h).

**Table S1.** Summary of the tissue donors used.

**Table S2.** Complete list of the genes analyzed (GenBank/Uni-Gene IDs).

Please note: Wiley-Blackwell is not responsible for the content or functionality of any supporting information supplied by the authors. Any queries (other than missing material) should be directed to the corresponding author for the article.

**Supplemental Table 1. Summary of the tissue donors used**

| Subjects           | Age (yr) | Sex | Classification                      | Etiology                                                | Previous medication                      | Related conditions                                                     |
|--------------------|----------|-----|-------------------------------------|---------------------------------------------------------|------------------------------------------|------------------------------------------------------------------------|
| Epi 1 <sup>a</sup> | 43       | F   | Right mesial temporal lobe epilepsy | Mesial temporal sclerosis                               | TPM,PHT                                  | Depression                                                             |
| Epi 2 <sup>a</sup> | 37       | M   | Left mesial temporal lobe epilepsy  | Mesial temporal sclerosis                               | PHT, PB, VPA                             | Psychiatric disorder                                                   |
| Epi 3 <sup>a</sup> | 53       | F   | Right parietotemporal lobe epilepsy | Vascular malformation                                   | PHT, VPA, PB,PRM,FBM, GBP,TPM,CBZ, DMX   | Port-wine stain                                                        |
| Epi 4 <sup>a</sup> | 39       | M   | Right mesial temporal lobe epilepsy | Mesial temporal sclerosis                               | TPM, PHT                                 | Childhood febrile seizure                                              |
| Epi 5 <sup>b</sup> | 30       | F   | Left temporal lobe epilepsy         | Left hippocampal atrophy                                | CBZ, PB,PRM                              | Childhood febrile seizure                                              |
| Epi 6 <sup>b</sup> | 5        | F   | Right hemispheric epilepsy          | Remote symptomatic, hemiconvulsive hemiplegia epilepsy  | GBP,OXC,PBT, PHT, VPA,ZNS;               | Severe hemiparesis (left)<br>Hemianopsia (left)<br>Developmental delay |
| Epi 7 <sup>b</sup> | 39       | M   | Focal epilepsy                      | Unknown                                                 | CBZ,DZ,GBP, LEV, PHT, PRM, TPM, VPA, ZNS | none                                                                   |
| Epi 8 <sup>b</sup> | 1        | F   | Hemispheric Epilepsy                | Malformation of cortical development (right hemisphere) | TPM                                      | Hemiparesis (left),<br>developmental delay, severe hypotonia           |

| Subjects             | Age (yr) | Sex | Classification                                    | Rankin grading scale | Previous medication | Related conditions |
|----------------------|----------|-----|---------------------------------------------------|----------------------|---------------------|--------------------|
| Ane 190 <sup>a</sup> | 41       | M   | Middle cerebral artery aneurysm                   | I                    | Unknown             | Alcoholism         |
| Ane 191 <sup>a</sup> | 59       | M   | Anterior communicating aneurysm                   | II                   | Propranolol         | Hypertension       |
| Ane 200 <sup>a</sup> | 77       | F   | Left distal branch of middle cerebral aneurysm    | I                    | Doxepin             | Hypertension       |
| Ane 201 <sup>a</sup> | 51       | F   | Middle cerebral artery aneurysm, acute hemorrhage | I                    | Unknown             | Unknown            |

TPM, Topamax, Topiramate; PHT, Phenytoin, Dilantin; PBT, Phenobarbital; PRM, Primidone; FBM, Felbamate; GBP, Gabapentin, Neurontin; DZ, Diazepam; CBZ, Carbamazepine, Tegretol; DMX, Diamox, VPA, Valproic acid, Valproate, Depakene; LEV, Levetiracetam, Keppra; ZNS, Zonisamide, Zonegran; LZP, Lorazepam, Ativan; LTG, Lamotrigine, Lamictal; OXC, Oxcarbamazepine; TLE, Temporal Lobe Epilepsy.

<sup>a</sup> Gene filter analysis, *in vitro* experiments, <sup>b</sup> Immunocytochemistry
